# Supplementary material for: Adapting to altered auditory cues: Generalization from manual reaching to head pointing
Source: PubMed Central journal article supplement (PMC9009652; doi:10.1371/journal.pone.0263509), 2022-04-14

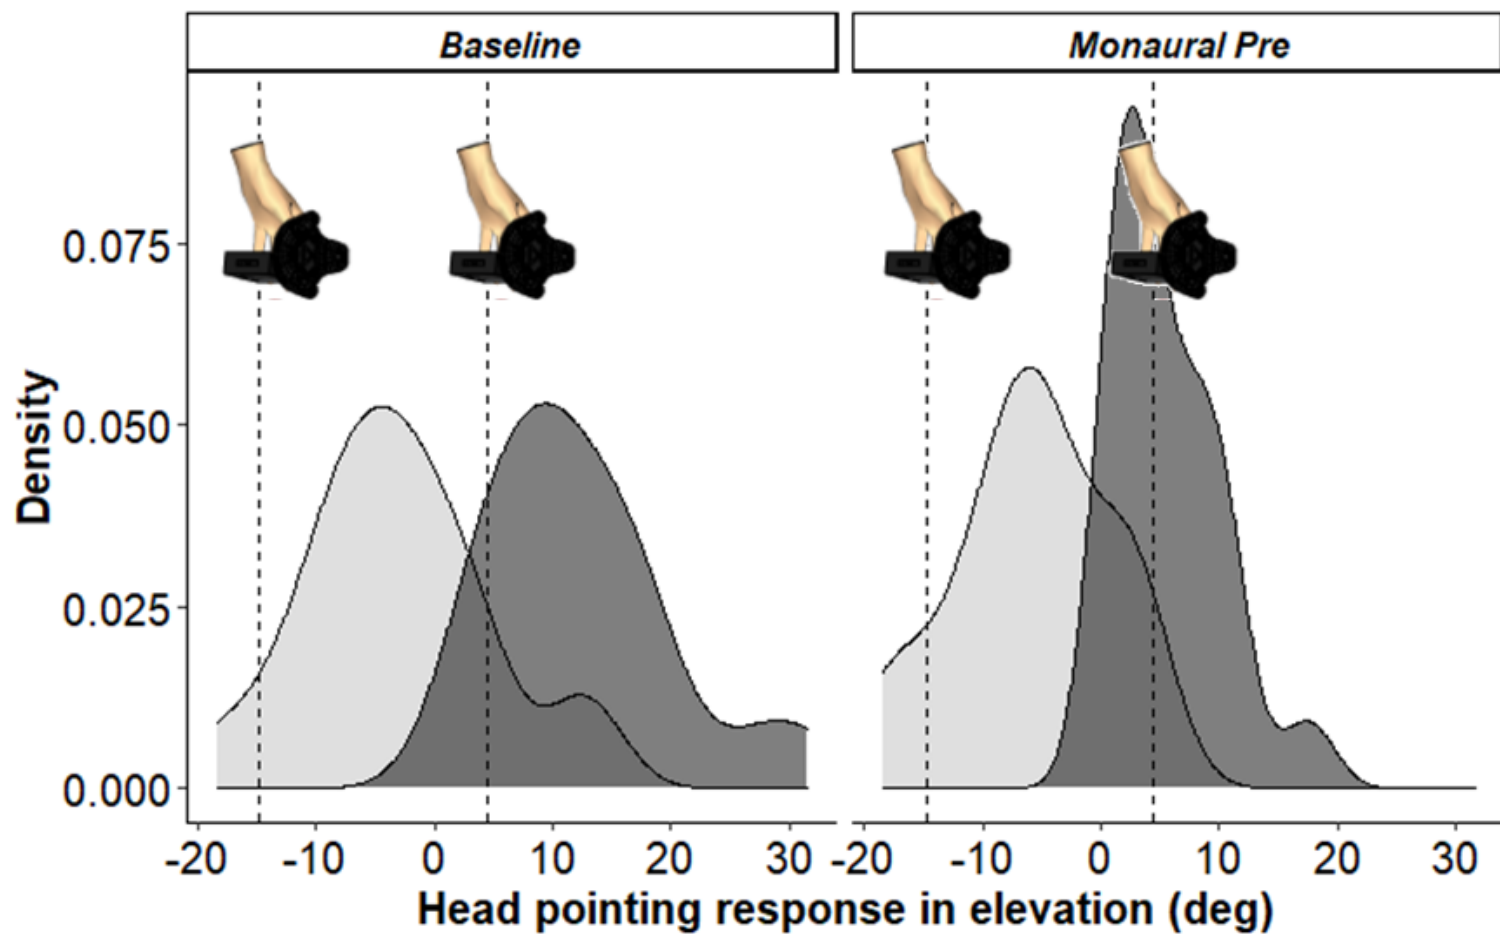

Supplement: pone.0263509.s001.pdf [file pone.0263509.s001.pdf]
