# Supplementary material for: Adapting to altered auditory cues: Generalization from manual reaching to head pointing
Source: PubMed Central journal article supplement (PMC9009652; doi:10.1371/journal.pone.0263509), 2022-04-14
Supplement: pone.0263509.s002.pdf [file pone.0263509.s002.pdf]

|                                                       | <i>X<sup>2</sup></i> | <i>df</i> | <i>p</i> |
|-------------------------------------------------------|----------------------|-----------|----------|
| <b>AZIMUTH Absolute error</b>                         |                      |           |          |
| TESTING PHASE                                         | 76.45                | 1         | <.001    |
| TRAINING TYPE                                         | 0.14                 | 1         | .071     |
| AZIMUTH SOUND POSITION                                | 20.09                | 1         | <.001    |
| TESTING PHASE* TRAINING TYPE                          | 19.18                | 1         | <.001    |
| TESTING PHASE* AZIMUTH SOUND POSITION                 | 7.78                 | 1         | .005     |
| TRAINING TYPE * AZIMUTH SOUND POSITION                | 5.39                 | 1         | .02      |
| TESTING PHASE* TRAINING TYPE * AZIMUTH SOUND POSITION | 3.39                 | 1         | .07      |
| <b>AZIMUTH Signed error</b>                           |                      |           |          |
| TESTING PHASE                                         | 58.07                | 1         | <.001    |
| TRAINING TYPE                                         | 0.05                 | 1         | .082     |
| AZIMUTH SOUND POSITION                                | 9.96                 | 1         | .002     |
| TESTING PHASE* TRAINING TYPE                          | 27.26                | 1         | <.001    |
| TESTING PHASE* AZIMUTH SOUND POSITION                 | 0.21                 | 1         | .65      |
| TRAINING TYPE * AZIMUTH SOUND POSITION                | 1.53                 | 1         | .22      |
| TESTING PHASE* TRAINING TYPE * AZIMUTH SOUND POSITION | 7.18                 | 1         | .007     |
| <b>ELEVATION Absolute error</b>                       |                      |           |          |
| TESTING PHASE                                         | 3.40                 | 1         | 0.07     |
| TRAINING TYPE                                         | 3.78                 | 1         | 0.05     |
| TESTING PHASE* TRAINING TYPE                          | 0.46                 | 1         | 0.50     |
| <b>ELEVATION Signed error</b>                         |                      |           |          |
| TESTING PHASE                                         | 22.31                | 1         | <.001    |
| TRAINING TYPE                                         | 12.67                | 1         | <.001    |
| TESTING PHASE* TRAINING TYPE                          | 2.68                 | 1         | 0.10     |
