# Supplementary material for: Adapting to altered auditory cues: Generalization from manual reaching to head pointing
Source: PubMed Central journal article supplement (PMC9009652; doi:10.1371/journal.pone.0263509), 2022-04-14
Supplement: pone.0263509.s003.pdf [file pone.0263509.s003.pdf]

|                       |          |             | <b>-15</b>   |              |             |             | <b>5</b>     |              |             |             |
|-----------------------|----------|-------------|--------------|--------------|-------------|-------------|--------------|--------------|-------------|-------------|
|                       | PHASE    | TRAINING    | <b>-67.5</b> | <b>-22.5</b> | <b>22.5</b> | <b>67.5</b> | <b>-67.5</b> | <b>-22.5</b> | <b>22.5</b> | <b>67.5</b> |
| <b>Absolute error</b> | Baseline |             | 5.9±8.5      | 3.0±1.8      | 2.9±1.2     | 6.2±10.3    | 5.6±9.7      | 3.1±1.3      | 3.0±1.9     | 5.1±8.4     |
|                       | Pre      | Spatial     | 12.0±12.3    | 18.5±11.6    | 22.1±14.8   | 23.6±15.7   | 14.5±13.9    | 16.5±11.8    | 23.6±16.8   | 23.5±15.4   |
|                       | Post     | Spatial     | 10.9±9.5     | 9.9±7.9      | 10.4±10.8   | 13.5±10.9   | 9.5±9.2      | 10.8±9.2     | 13.2±12.0   | 13.6±9.4    |
|                       | Pre      | Non-Spatial | 12.4±8.1     | 17.8±9.9     | 24.1±15.4   | 25.5±21.9   | 10.9±9.0     | 16.1±8.6     | 20.1±14.8   | 26.3±20.3   |
|                       | Post     | Non-Spatial | 9.7±6.2      | 12.6±9.1     | 14.6±12.3   | 21.5±17.7   | 10.5± 7.4    | 12.5±9.3     | 14.4±11.6   | 20.5±16.9   |
| <b>Signed error</b>   | Baseline |             | 1.5±10.0     | -0.8±3.0     | 0.5±2.6     | -3.1±11.5   | 1.5±10.9     | -0.3±2.8     | 0.2±2.8     | -1.2±9.6    |
|                       | Pre      | Spatial     | -7.0±15.5    | -16.9±13.5   | -15.5±21.9  | -21.3±18.9  | -7.9±18.4    | -15.9±12.5   | -14.9±25.1  | -21.2±18.5  |
|                       | Post     | Spatial     | -2.3±13.4    | -3.7±11.0    | -3.6±14.2   | -7.5±15.5   | -1.8±12.5    | -9.1±10.3    | -5.2±16.4   | -8.2±13.7   |
|                       | Pre      | Non-Spatial | -8.9±11.6    | -15.0±13.2   | -17.7±22.1  | -23.2±24.4  | -7.2±11.7    | -13.0±13.0   | -13.5±21.1  | -23.7±22.7  |
|                       | Post     | Non-Spatial | -4.0±9.8     | -8.2±12.6    | -9.7±16.2   | -19.3±19.8  | -3.6±12.0    | -10.8±10.5   | -7.2±16.7   | -19.1±18.3  |
